# Supplementary material for: Negative contribution from defects responsible for low Young's modulus of graphene oxide at small defect densities
Source: Royal Society of Chemistry journal article supplement (doi:10.1039/d4cp03522d), 2024-11-27
Supplement: d4cp03522d1.pdf [file d4cp03522d1.pdf]

## Negative contribution from defects responsible for low Young's modulus of Graphene Oxide at small defect densities

### (Supplementary Information)

Sownyak Mondal, Soumya Ghosh\*

*Tata Institute of Fundamental Research Hyderabad, Hyderabad, 500046, Telangana, India*

**Contents:** The supporting information contains two tables (Table S1 and Table S2).

**Table S1.** Elemental parameters used in the simulation.

| Element | Cov Radius (Å) | Rvdw (Radius of van der Waals) (Å) | Evdw (Energy of van der Waals) (kcal/mol) |
|---------|----------------|------------------------------------|-------------------------------------------|
| C       | 1.3825         | 1.9133                             | 0.1853                                    |
| H       | 0.7853         | 1.5904                             | 0.0419                                    |
| O       | 1.2477         | 1.9236                             | 0.0904                                    |

**Table S2:** Atom counts at different O/C ratios.

| O/C (%) | System | Carbon | Oxygen | Hydrogen |
|---------|--------|--------|--------|----------|
| 5       | dGO    | 960    | 9      | 0        |
|         | GO     | 960    | 30     | 1        |
|         | rGO    | 959    | 5      | 3        |
| 8       | dGO    | 960    | 9      | 0        |
|         | GO     | 960    | 43     | 1        |
|         | rGO    | 956    | 8      | 0        |
| 15      | dGO    | 960    | 34     | 2        |
|         | GO     | 960    | 95     | 3        |
|         | rGO    | 936    | 29     | 3        |
| 20      | dGO    | 960    | 55     | 2        |
|         | GO     | 960    | 124    | 5        |
|         | rGO    | 922    | 53     | 5        |

|    |            |     |     |    |
|----|------------|-----|-----|----|
| 25 | <b>dGO</b> | 958 | 59  | 0  |
|    | <b>GO</b>  | 958 | 159 | 11 |
|    | <b>rGO</b> | 910 | 56  | 8  |

**Table S3:** Contribution of different categories of atoms to the total Young's modulus for 5% and 15% O/C ratios

**5% O/C**

| <b>System</b>   | <b>D (Gpa)</b> | <b>C<sub>G</sub> (Gpa)</b> | <b>C<sub>O</sub> + O/H</b> | <b>Total Young's modulus (GPa)</b> |
|-----------------|----------------|----------------------------|----------------------------|------------------------------------|
| <b>Graphene</b> | 0.00           | 526.27                     | 0.0                        | 526.27                             |
| <b>Oxidized</b> | 0.0            | 570.73                     | -65.65                     | 505.08                             |
| <b>dGO</b>      | 19.17          | 437.60                     | -6.5                       | 450.27                             |
| <b>GO</b>       | -12.77         | 437.30                     | -13.48                     | 411.05                             |

**15% O/C**

| <b>System</b>   | <b>D (Gpa)</b> | <b>C<sub>G</sub> (Gpa)</b> | <b>C<sub>O</sub> + O/H</b> | <b>Total Young's modulus (GPa)</b> |
|-----------------|----------------|----------------------------|----------------------------|------------------------------------|
| <b>Graphene</b> | 0.00           | 526.27                     | 0.0                        | 526.27                             |
| <b>Oxidized</b> | 0.0            | 631.91                     | -125.86                    | 506.05                             |
| <b>dGO</b>      | 42.43          | 334.60                     | 0.37                       | 377.40                             |
| <b>GO</b>       | 97.92          | 245.40                     | -14.03                     | 329.29                             |

**Table S4:** Thermochemistry of substitution of oxygen atoms by hydrogen atoms in graphene oxide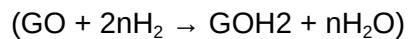

|                           | n = 1               | n = 32                | n = 32 (averaged over snapshots) |
|---------------------------|---------------------|-----------------------|----------------------------------|
| $E_{\text{GO}}$           | -190391.81 kcal/mol | -190391.81 kcal/mol   | -190657.36 kcal/mol              |
| $2nE_{\text{H}_2}$        | 2x(-58.78) kcal/mol | 64x(-58.78) kcal/mol  | 64x(-58.78) kcal/mol             |
| $nE_{\text{H}_2\text{O}}$ | -235.68 kcal/mol    | 32x(-235.68) kcal/mol | 32x(-235.68) kcal/mol            |
| $E_{\text{GOH}_2}$        | -190325.32 kcal/mol | -191020.56 kcal/mol   | -191955.01 kcal/mol              |
| $\Delta E$                | -51.68 kcal/mol     | -4407.72 kcal/mol     | -5077.49 kcal/mol                |
| $\Delta E/n$              | -51.68 kcal/mol     | -137.74 kcal/mol      | -158.67 kcal/mol                 |
